# Supplementary figures and images for: The interactive presentation of 3D information obtained from reconstructed datasets and 3D placement of single histological sections with the 3D portable document format
Source: Oxford University Press journal article supplement (doi:10.1242/dev.051086), 2010-12-07

Figure S1

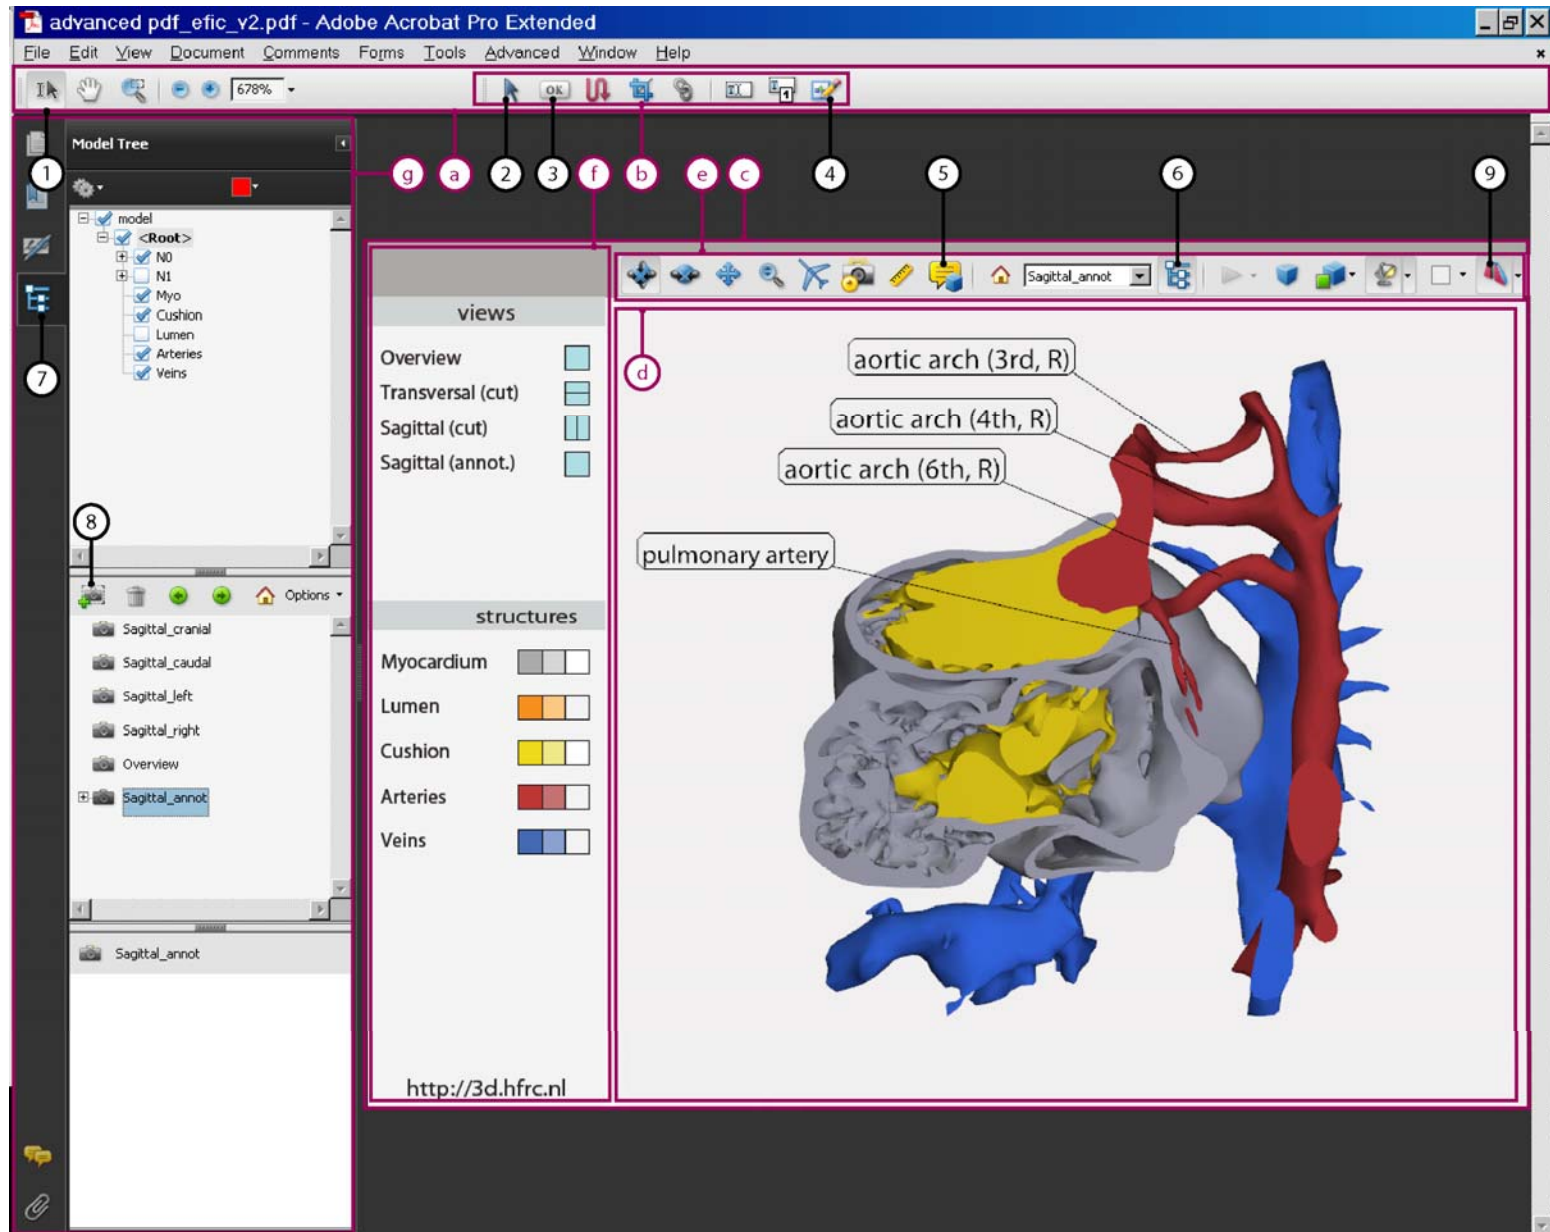

Supplement: dev051086figs1.pdf [file dev051086figs1.pdf]
